# Supplementary material
Source: PubMed Central journal article supplement (PMC3445734)
Supplement: NIHMS384361-supplement-13.pdf [file NIHMS384361-supplement-13.pdf]

Supplementary figure 13

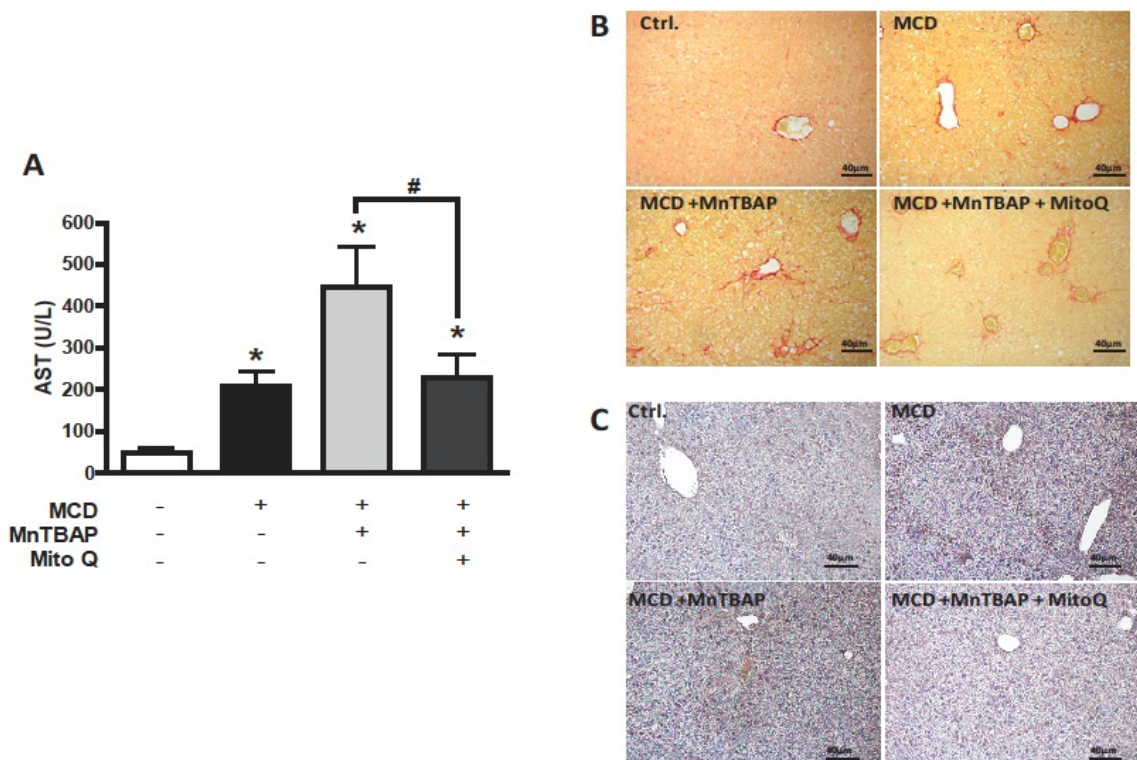

Supplementary Figure 13. **Effect of MitoQ in mice fed MCD.** Mice fed MCD were treated in vivo with MitoQ and liver samples were assessed for liver damage as serum AST (A), liver fibrosis by Sirius red stainin (B) or myeloperoxidase staining (C). \* $p < 0.05$  vs. control; # $p < 0.05$  vs. MCD+MnTBAP.
